# Supplementary material for: Gene Expression Changes of Murine Cortex Homeostasis in Response to Sleep Deprivation Hint Dysregulated Aging-like Transcriptional Responses
Source: MDPI journal article supplement (doi:10.3390/brainsci12070825), 2022-06-24
Supplement: s1 [file s1]

**Table S1.** Characteristics of the gene expression datasets included in the analysis.

| Characteristics                      | Gene expression datasets                                                                                                                                                                                                |                                                                                                                                                                                                                                                             |                                                                                                                             |
|--------------------------------------|-------------------------------------------------------------------------------------------------------------------------------------------------------------------------------------------------------------------------|-------------------------------------------------------------------------------------------------------------------------------------------------------------------------------------------------------------------------------------------------------------|-----------------------------------------------------------------------------------------------------------------------------|
|                                      | GSE6514                                                                                                                                                                                                                 | GSE78215                                                                                                                                                                                                                                                    | GSE33491                                                                                                                    |
| Sex                                  | Male                                                                                                                                                                                                                    | Male                                                                                                                                                                                                                                                        | Male                                                                                                                        |
| Strain model                         | C57BL/6J                                                                                                                                                                                                                | C57BL/6J                                                                                                                                                                                                                                                    | C57BL/6J                                                                                                                    |
| Control samples<br>( <i>n</i> , age) | <i>n</i> = 5, 10-weeks old ( $\pm 1$ week)                                                                                                                                                                              | <i>n</i> = 7, 2-months old                                                                                                                                                                                                                                  | <i>n</i> = 3, 10-weeks old                                                                                                  |
| Test samples<br>( <i>n</i> , age)    | <i>n</i> = 5, 10-weeks old ( $\pm 1$ week)                                                                                                                                                                              | <i>n</i> = 7, 2-months old                                                                                                                                                                                                                                  | <i>n</i> = 3, 10-weeks old                                                                                                  |
| Cortical samples                     | M1 and M2 regions                                                                                                                                                                                                       | Whole left cortex                                                                                                                                                                                                                                           | Whole cortex                                                                                                                |
| Experimental conditions              | <ul style="list-style-type: none"> <li>– SD was performed through gentle handling</li> <li>– SD started at ZT0 (7:00 AM) and fished at ZT6 (13:00 AM)</li> <li>– Tissue was collected immediately afterwards</li> </ul> | <ul style="list-style-type: none"> <li>– SD was performed through brushing</li> <li>– SD started at ZT0 (7:30 AM) and fished at ZT6 (13:30 AM)</li> <li>– Started at ZT0 and finished ZT6</li> <li>– Tissue was collected immediately afterwards</li> </ul> | <ul style="list-style-type: none"> <li>– NA</li> <li>– NA</li> <li>– Tissue was collected immediately afterwards</li> </ul> |
| Microarray platform                  | GPL1261                                                                                                                                                                                                                 | GPL17400                                                                                                                                                                                                                                                    | GPL6096                                                                                                                     |

**Table S2.** Differentially expressed genes of the cerebral cortex between mice that were sleep deprived for 6 hours and circadian-matched controls that were left undisturbed.

| Gene ID            | P-value  | Z-score | Gene name                                              |
|--------------------|----------|---------|--------------------------------------------------------|
| <i>Upregulated</i> |          |         |                                                        |
| ACTN4              | 5.12E-03 | 4.27    | actinin alpha 4                                        |
| ADORA1             | 4.69E-02 | 3.40    | adenosine A1 receptor                                  |
| ARHGAP25           | 3.46E-02 | 3.53    | Rho GTPase activating protein 25                       |
| ARHGEF7            | 1.55E-04 | 5.24    | Rho guanine nucleotide exchange factor 7               |
| ARID5A             | 3.95E-02 | 3.48    | AT-rich interaction domain 5A                          |
| BCL6               | 1.32E-02 | 3.92    | BCL6 transcription repressor                           |
| BHLHE40            | 7.70E-04 | 4.79    | basic helix-loop-helix family member e40               |
| BTBD9              | 1.56E-03 | 4.60    | BTB domain containing 9                                |
| CALHM2             | 6.07E-03 | 4.20    | calcium homeostasis modulator family member 2          |
| CHRD               | 2.94E-03 | 4.43    | chordin                                                |
| CLDN2              | 3.04E-02 | 3.60    | claudin 2                                              |
| COTL1              | 4.73E-02 | 3.39    | coactosin like F-actin binding protein 1               |
| CRELD2             | 4.08E-06 | 6.29    | cysteine rich with EGF like domains 2                  |
| CRH                | 1.17E-03 | 4.68    | corticotropin releasing hormone                        |
| CSDC2              | 7.72E-03 | 4.10    | cold shock domain containing C2                        |
| CTLA2A             | 4.92E-04 | 4.94    | cytotoxic T lymphocyte-associated protein 2 alpha      |
| DHX16              | 3.81E-02 | 3.49    | DEAH-box helicase 16                                   |
| DUSP4              | 9.42E-05 | 5.47    | dual specificity phosphatase 4                         |
| EBP                | 3.03E-02 | 3.60    | EBP cholesterol delta-isomerase                        |
| EGR3               | 7.33E-03 | 4.13    | early growth response 3                                |
| EPHA10             | 3.41E-02 | 3.55    | EPH receptor A10                                       |
| EVC2               | 4.33E-02 | 3.44    | EvC ciliary complex subunit 2                          |
| EZR                | 6.34E-04 | 4.87    | eZRin                                                  |
| FAM20A             | 1.18E-03 | 4.67    | FAM20A golgi associated secretory pathway pseudokinase |
| FAM53B             | 3.38E-03 | 4.38    | family with sequence similarity 53 member B            |
| Fam84a             | 6.69E-04 | 4.82    | family with sequence similarity 84, member A           |
| FEZF2              | 2.86E-02 | 3.63    | FEZ family zinc finger 2                               |
| FOSL2              | 1.16E-05 | 5.86    | FOS like 2, AP-1 transcription factor subunit          |
| GADD45A            | 3.46E-04 | 5.04    | growth arrest and DNA damage inducible alpha           |

|         |          |      |                                                                               |
|---------|----------|------|-------------------------------------------------------------------------------|
| HEXIM1  | 2.71E-04 | 5.11 | HEXIM P-TEFb complex subunit 1                                                |
| HS3ST2  | 2.86E-02 | 3.63 | heparan sulfate-glucosamine 3-sulfotransferase 2                              |
| HTR1B   | 2.86E-02 | 3.63 | 5-hydroxytryptamine receptor 1B                                               |
| HTR5B   | 2.43E-03 | 4.48 | 5-hydroxytryptamine (serotonin) receptor 5B                                   |
| HTRA1   | 3.91E-02 | 3.49 | HtrA serine peptidase 1                                                       |
| IRF2    | 4.52E-04 | 4.97 | interferon regulatory factor 2                                                |
| IRF3    | 3.45E-02 | 3.54 | interferon regulatory factor 3                                                |
| ITPK1   | 4.95E-02 | 3.37 | inositol-tetrakisphosphate 1-kinase                                           |
| JAGN1   | 1.27E-02 | 3.94 | jagunal homolog 1                                                             |
| KLF10   | 6.07E-03 | 4.19 | Kruppel like factor 10                                                        |
| LRFN2   | 5.51E-03 | 4.24 | leucine rich repeat and fibronectin type III domain containing 2              |
| MAFG    | 4.30E-02 | 3.44 | MAF bZIP transcription factor G                                               |
| MAP2K3  | 1.97E-02 | 3.78 | mitogen-activated protein kinase kinase 3                                     |
| METRNL  | 4.14E-02 | 3.46 | meteorin like, glial cell differentiation regulator                           |
| METTL3  | 2.06E-03 | 4.53 | methyltransferase 3, N6-adenosine-methyltransferase complex catalytic subunit |
| MIDN    | 5.62E-04 | 4.90 | midnolin                                                                      |
| MUP5    | 4.73E-02 | 3.39 | major urinary protein 5                                                       |
| NEFM    | 4.34E-02 | 3.43 | neurofilament medium chain                                                    |
| NFIL3   | 6.26E-03 | 4.18 | nuclear factor, interleukin 3 regulated                                       |
| NFKBIA  | 7.72E-03 | 4.10 | NFKB inhibitor alpha                                                          |
| NOSTRIN | 7.44E-03 | 4.11 | nitric oxide synthase trafficking                                             |
| NUAK1   | 1.55E-04 | 5.27 | NUAK family kinase 1                                                          |
| P4HA2   | 2.86E-02 | 3.63 | prolyl 4-hydroxylase subunit alpha 2                                          |
| PCDH17  | 4.85E-02 | 3.38 | protocadherin 17                                                              |
| PCP2    | 4.85E-02 | 3.38 | Purkinje cell protein 2                                                       |
| PDE2A   | 4.72E-02 | 3.40 | phosphodiesterase 2A                                                          |
| POM121  | 3.15E-02 | 3.58 | POM121 transmembrane nucleoporin                                              |
| PPP2R1B | 3.03E-02 | 3.60 | protein phosphatase 2 scaffold subunit Abeta                                  |
| PRSS23  | 3.33E-02 | 3.56 | serine protease 23                                                            |
| PTCHD2  | 1.78E-02 | 3.82 | Patched domain-containing protein 2                                           |
| PTPN1   | 1.27E-02 | 3.94 | protein tyrosine phosphatase non-receptor type 1                              |
| RGS17   | 2.13E-03 | 4.52 | regulator of G protein signaling 17                                           |
| RHOBTB2 | 2.81E-02 | 3.64 | Rho related BTB domain containing 2                                           |
| RIN1    | 6.69E-04 | 4.84 | Ras and Rab interactor 1                                                      |

|                      |          |       |                                                                                  |
|----------------------|----------|-------|----------------------------------------------------------------------------------|
| RIN2                 | 1.55E-02 | 3.88  | Ras and Rab interactor 2                                                         |
| RND3                 | 2.29E-02 | 3.72  | Rho family GTPase 3                                                              |
| SAMD4B               | 1.25E-04 | 5.35  | sterile alpha motif domain containing 4B                                         |
| SAP30                | 2.19E-02 | 3.74  | Sin3A associated protein 30                                                      |
| SBK1                 | 5.62E-04 | 4.91  | SH3 domain binding kinase 1                                                      |
| SDF2L1               | 4.84E-06 | 6.15  | stromal cell derived factor 2 like 1                                             |
| SDK2                 | 4.53E-02 | 3.42  | sidekick cell adhesion molecule 2                                                |
| SGK1                 | 1.82E-02 | 3.80  | serum/glucocorticoid regulated kinase 1                                          |
| SLC43A1              | 2.45E-02 | 3.69  | solute carrier family 43 member 1                                                |
| SLC9A3R2             | 3.09E-03 | 4.41  | SLC9A3 regulator 2                                                               |
| SNRK                 | 3.46E-02 | 3.53  | SNF related kinase                                                               |
| SNTB2                | 4.52E-04 | 4.98  | syntrophin beta 2                                                                |
| SOX11                | 3.46E-02 | 3.53  | SRY-box transcription factor 11                                                  |
| SPRED3               | 1.55E-04 | 5.25  | sprouty related EVH1 domain containing 3                                         |
| STAC3                | 4.33E-02 | 3.44  | SH3 and cysteine rich domain 3                                                   |
| STARD8               | 3.41E-02 | 3.55  | StAR related lipid transfer domain containing 8                                  |
| TAF12                | 2.29E-02 | 3.72  | TATA-box binding protein associated factor 12                                    |
| TCN2                 | 5.65E-03 | 4.23  | transcobalamin 2                                                                 |
| TJAP1                | 2.65E-02 | 3.67  | tight junction associated protein 1                                              |
| TMEM178A             | 6.69E-04 | 4.83  | transmembrane protein 178                                                        |
| TNFRSF12A            | 4.17E-02 | 3.45  | TNF receptor superfamily member 12A                                              |
| TSC22D3              | 7.04E-06 | 6.03  | TSC22 domain family member 3                                                     |
| TTYH3                | 1.27E-02 | 3.94  | tweety family member 3                                                           |
| WFDC1                | 2.86E-02 | 3.62  | WAP four-disulfide core domain 1                                                 |
| ZBTB40               | 9.47E-05 | 5.45  | zinc finger and BTB domain containing 40                                         |
| ZHX2                 | 7.42E-03 | 4.12  | zinc fingers and homeoboxes 2                                                    |
| ZNRF1                | 1.25E-04 | 5.36  | zinc and ring finger 1                                                           |
| 1700123O20Rik        | 2.02E-02 | 3.77  | RIKEN cDNA 1700123O20 gene                                                       |
| <i>Downregulated</i> |          |       |                                                                                  |
| A730017C20Rik        | 4.94E-03 | -4.28 | RIKEN cDNA A730017C20 gene                                                       |
| ACTR3B               | 3.35E-02 | -3.55 | actin related protein 3B                                                         |
| ADSS                 | 3.03E-02 | -3.60 | adenylosuccinate synthetase, non muscle                                          |
| ANKMY2               | 1.65E-02 | -3.85 | ankyrin repeat and MYND domain containing 2                                      |
| APPL2                | 4.36E-02 | -3.43 | adaptor protein, phosphotyrosine interacting with PH domain and leucine zipper 2 |

|            |          |       |                                                                  |
|------------|----------|-------|------------------------------------------------------------------|
| ASB11      | 1.71E-02 | -3.83 | ankyrin repeat and SOCS box containing 11                        |
| ASPA       | 7.80E-03 | -4.09 | aspartoacylase                                                   |
| ASRGL1     | 3.76E-02 | -3.50 | asparaginase and isoaspartyl peptidase 1                         |
| ATPAF1     | 1.62E-02 | -3.85 | ATP synthase mitochondrial F1 complex assembly factor 1          |
| BRCA2      | 1.44E-02 | -3.90 | BRCA2 DNA repair associated                                      |
| CBR4       | 8.33E-03 | -4.07 | carbonyl reductase 4                                             |
| CC2D2A     | 3.46E-02 | -3.53 | coiled-coil and C2 domain containing 2A                          |
| CCNDBP1    | 7.44E-03 | -4.11 | cyclin D1 binding protein 1                                      |
| CDC42SE2   | 2.43E-03 | -4.48 | CDC42 small effector 2                                           |
| CFL2       | 3.20E-02 | -3.57 | cofilin 2                                                        |
| CIRBP      | 2.71E-04 | -5.12 | cold inducible RNA binding protein                               |
| CNTLN      | 5.12E-03 | -4.27 | centlein                                                         |
| CNTN1      | 1.27E-02 | -3.94 | contactin 1                                                      |
| COBLL1     | 2.80E-02 | -3.65 | cordon-bleu WH2 repeat protein like 1                            |
| COMMD10    | 1.90E-02 | -3.79 | COMM domain containing 10                                        |
| CSGALNACT1 | 4.99E-02 | -3.37 | chondroitin sulfate N-acetylgalactosaminyltransferase 1          |
| CSPG5      | 3.32E-02 | -3.56 | chondroitin sulfate proteoglycan 5                               |
| CTDSPL     | 1.62E-02 | -3.86 | CTD small phosphatase like                                       |
| DARS2      | 2.19E-02 | -3.74 | aspartyl-tRNA synthetase 2, mitochondrial                        |
| DDB2       | 2.80E-02 | -3.64 | damage specific DNA binding protein 2                            |
| DIS3L2     | 4.73E-02 | -3.39 | DIS3 like 3'-5' exoribonuclease 2                                |
| DNAJC18    | 4.69E-02 | -3.40 | DnaJ heat shock protein family (Hsp40) member C18                |
| EDN1       | 4.63E-03 | -4.30 | endothelin 1                                                     |
| EFHC2      | 4.85E-02 | -3.38 | EF-hand domain containing 2                                      |
| ENPP3      | 1.15E-02 | -3.98 | ectonucleotide pyrophosphatase/phosphodiesterase 3               |
| ENPP5      | 7.33E-03 | -4.13 | ectonucleotide pyrophosphatase/phosphodiesterase family member 5 |
| ERBB2IP    | 1.27E-02 | -3.93 | ERBB2 interacting protein                                        |
| ERLIN2     | 1.80E-02 | -3.81 | ER lipid raft associated 2                                       |
| FAM171B    | 4.69E-02 | -3.40 | family with sequence similarity 171 member B                     |
| FAM175A    | 2.64E-02 | -3.67 | Abraxas 1, BRCA1 A complex subunit                               |
| FAP        | 1.62E-02 | -3.86 | fibroblast activation protein alpha                              |
| FBXL21     | 4.17E-02 | -3.45 | F-box and leucine-rich repeat protein 21                         |
| FBXL4      | 6.51E-04 | -4.85 | F-box and leucine rich repeat protein 4                          |
| FBXO32     | 1.73E-02 | -3.83 | F-box protein 32                                                 |

|          |          |       |                                                                            |
|----------|----------|-------|----------------------------------------------------------------------------|
| FEM1C    | 2.70E-02 | -3.66 | fem-1 homolog C                                                            |
| FIG4     | 3.45E-02 | -3.54 | FIG4 phosphoinositide 5-phosphatase                                        |
| GAS5     | 3.32E-02 | -3.56 | growth arrest specific 5                                                   |
| GPR37    | 9.36E-04 | -4.73 | G protein-coupled receptor 37                                              |
| HADH     | 9.36E-04 | -4.73 | hydroxyacyl-CoA dehydrogenase                                              |
| HEXDC    | 1.27E-02 | -3.95 | hexosaminidase (glycosyl hydrolase family 20, catalytic domain) containing |
| HOOK2    | 6.07E-03 | -4.20 | hook microtubule tethering protein 2                                       |
| HS2ST1   | 6.75E-03 | -4.16 | heparan sulfate 2-O-sulfotransferase 1                                     |
| HS3ST1   | 2.70E-02 | -3.66 | heparan sulfate-glucosamine 3-sulfotransferase 1                           |
| ING2     | 3.45E-02 | -3.54 | inhibitor of growth family member 2                                        |
| ITM2A    | 9.29E-04 | -4.74 | integral membrane protein 2A                                               |
| KLF11    | 1.62E-02 | -3.86 | Kruppel like factor 11                                                     |
| KLHL23   | 5.94E-03 | -4.21 | kelch like family member 23                                                |
| LACTB2   | 4.85E-02 | -3.38 | lactamase beta 2                                                           |
| LAMA2    | 3.00E-02 | -3.61 | laminin subunit alpha 2                                                    |
| LSS      | 1.93E-02 | -3.79 | lanosterol synthase                                                        |
| MAP2K5   | 4.62E-02 | -3.41 | mitogen-activated protein kinase kinase 5                                  |
| MCM8     | 1.32E-02 | -3.92 | minichromosome maintenance 8 homologous recombination repair factor        |
| MOG      | 2.16E-02 | -3.75 | myelin oligodendrocyte glycoprotein                                        |
| NFYB     | 3.20E-02 | -3.57 | nuclear transcription factor Y subunit beta                                |
| NICN1    | 3.15E-02 | -3.58 | nicotin 1, tubulin polyglutamylase complex subunit                         |
| OMG      | 1.55E-04 | -5.25 | oligodendrocyte myelin glycoprotein                                        |
| P2RY12   | 4.16E-02 | -3.46 | purinergic receptor P2Y12                                                  |
| PARL     | 1.78E-02 | -3.82 | presenilin associated rhomboid like                                        |
| PGM1     | 3.91E-02 | -3.48 | phosphoglucomutase 1                                                       |
| PKIA     | 3.95E-02 | -3.48 | cAMP-dependent protein kinase inhibitor alpha                              |
| PLA2G4E  | 1.16E-05 | -5.89 | phospholipase A2 group IVE                                                 |
| PPP2R2D  | 2.29E-02 | -3.72 | protein phosphatase 2 regulatory subunit Bdelta                            |
| PPP3CA   | 3.03E-02 | -3.60 | protein phosphatase 3 catalytic subunit alpha                              |
| PTBP2    | 3.46E-02 | -3.53 | polypyrimidine tract binding protein 2                                     |
| PTPRR    | 2.86E-02 | -3.62 | protein tyrosine phosphatase receptor type R                               |
| RAB40B   | 2.06E-03 | -4.54 | RAB40B, member RAS oncogene family                                         |
| RARS2    | 7.33E-03 | -4.13 | arginyl-tRNA synthetase 2, mitochondrial                                   |
| RASGEF1B | 3.40E-04 | -5.06 | RasGEF domain family member 1B                                             |

|               |          |       |                                                                 |
|---------------|----------|-------|-----------------------------------------------------------------|
| RBMS1         | 4.62E-02 | -3.41 | RNA binding motif single stranded interacting protein 1         |
| RCCD1         | 2.29E-02 | -3.72 | RCC1 domain containing 1                                        |
| RPAP2         | 3.81E-02 | -3.50 | RNA polymerase II associated protein 2                          |
| RRAGC         | 1.27E-02 | -3.94 | Ras related GTP binding C                                       |
| SCRN1         | 4.69E-02 | -3.40 | secernin 1                                                      |
| SERPINB1A     | 9.72E-03 | -4.03 | serine (or cysteine) peptidase inhibitor, clade B, member 1a    |
| SESTD1        | 3.09E-03 | -4.41 | SEC14 and spectrin domain containing 1                          |
| SGTB          | 3.09E-02 | -3.59 | small glutamine rich tetratricopeptide repeat co-chaperone beta |
| SH3BGRL2      | 3.46E-03 | -4.37 | SH3 domain binding glutamate rich protein like 2                |
| SLC35F5       | 7.44E-03 | -4.11 | solute carrier family 35 member F5                              |
| SLITRK1       | 1.27E-02 | -3.93 | SLIT and NTRK like family member 1                              |
| SPATA7        | 1.00E-02 | -4.02 | spermatogenesis associated 7                                    |
| SQLE          | 6.54E-03 | -4.17 | squalene epoxidase                                              |
| STARD4        | 3.81E-02 | -3.50 | StAR related lipid transfer domain containing 4                 |
| STOM          | 4.24E-02 | -3.45 | stomatin                                                        |
| SYNM          | 4.69E-02 | -3.40 | synemin                                                         |
| SYT10         | 4.64E-02 | -3.41 | synaptotagmin 10                                                |
| TCEA2         | 3.42E-03 | -4.38 | transcription elongation factor A2                              |
| TMEM132D      | 5.64E-03 | -4.23 | transmembrane protein 132D                                      |
| TMEM87B       | 2.19E-02 | -3.74 | transmembrane protein 87B                                       |
| TSPYL2        | 3.46E-02 | -3.53 | TSPY like 2                                                     |
| USP28         | 2.45E-02 | -3.70 | ubiquitin specific peptidase 28                                 |
| USP6NL        | 2.43E-03 | -4.48 | USP6 N-terminal like                                            |
| VPS4A         | 4.33E-02 | -3.44 | vacuolar protein sorting 4 homolog A                            |
| ZFP101        | 4.17E-02 | -3.46 | zinc finger protein 101                                         |
| ZFP239        | 1.80E-02 | -3.81 | zinc finger protein 239                                         |
| ZFYVE28       | 6.07E-03 | -4.20 | zinc finger FYVE-type containing 28                             |
| 1700016K19Rik | 1.26E-02 | -3.96 | RIKEN cDNA 1700016K19 gene                                      |
| 2410002F23Rik | 2.80E-02 | -3.65 | RIKEN cDNA 2410002F23 gene                                      |
| 2610524H06Rik | 2.29E-02 | -3.72 | RIKEN cDNA 2610524H06 gene                                      |
| 4930412C18Rik | 2.48E-02 | -3.69 | RIKEN cDNA 4930412C18 gene                                      |

**Table S3.** Interactome of the protein-protein interaction network of differentially expressed genes of the cerebral cortex between mice that were sleep deprived for 6 hours and circadian-matched controls that were left undisturbed. Ranking was ensued based on the intersection of 11 topological algorithms. Percolated Component (EPC), Maximum Neighborhood Component (MNC), Density of Maximum Neighborhood Component (DMNC), Maximal Clique Centrality (MCC).

| Gene ID   | MCC | DMNC | MNC | Degree | EPC | BottleNeck | EcCentricity | Closeness | Radiality | Betweenness | Stress |
|-----------|-----|------|-----|--------|-----|------------|--------------|-----------|-----------|-------------|--------|
| NFKBIA    | 1   | 1    | 1   | 1      | 1   | 1          | 2            | 1         | 1         | 1           | 1      |
| EZR       | 5   | 3    | 3   | 5      | 2   | 4          | 2            | 2         | 2         | 3           | 2      |
| SGK1      | 3   | 3    | 3   | 3      | 4   | 2          | 1            | 3         | 3         | 4           | 6      |
| EDN1      | 6   | 3    | 3   | 6      | 5   | 3          | 2            | 5         | 4         | 5           | 4      |
| ACTN4     | 9   | 3    | 3   | 8      | 14  | 5          | 13           | 16        | 16        | 2           | 3      |
| MAP2K5    | 2   | 25   | 25  | 2      | 3   | 10         | 2            | 4         | 6         | 9           | 5      |
| PPP3CA    | 9   | 3    | 3   | 8      | 8   | 7          | 2            | 8         | 8         | 29          | 28     |
| RND3      | 9   | 25   | 25  | 8      | 6   | 6          | 2            | 6         | 5         | 10          | 14     |
| SERPINB1A | 6   | 1    | 1   | 8      | 7   | 29         | 13           | 7         | 7         | 30          | 31     |
| FOSL2     | 3   | 3    | 3   | 3      | 15  | 18         | 29           | 11        | 23        | 18          | 17     |
| IRF3      | 19  | 3    | 3   | 19     | 17  | 18         | 13           | 10        | 12        | 19          | 18     |
| BCL6      | 9   | 3    | 3   | 8      | 9   | 29         | 13           | 9         | 13        | 26          | 29     |
| ACTR3B    | 9   | 3    | 3   | 8      | 36  | 7          | 29           | 29        | 36        | 7           | 8      |
| SLC9A3R2  | 19  | 3    | 3   | 19     | 11  | 51         | 2            | 13        | 9         | 23          | 24     |
| RHOBTB2   | 6   | 25   | 25  | 6      | 10  | 29         | 13           | 12        | 15        | 22          | 20     |
| ARHGEF7   | 19  | 25   | 25  | 19     | 18  | 7          | 13           | 24        | 20        | 8           | 10     |
| GADD45A   | 9   | 25   | 25  | 8      | 28  | 14         | 29           | 18        | 22        | 6           | 9      |
| MAP2K3    | 34  | 25   | 25  | 34     | 22  | 10         | 13           | 14        | 9         | 12          | 12     |
| DDB2      | 9   | 25   | 25  | 8      | 19  | 18         | 48           | 23        | 35        | 14          | 7      |
| NFIL3     | 9   | 3    | 3   | 8      | 16  | 51         | 29           | 20        | 27        | 41          | 33     |
| ASB11     | 34  | 25   | 25  | 34     | 21  | 10         | 13           | 17        | 14        | 31          | 25     |
| PPP2R2D   | 19  | 3    | 3   | 19     | 13  | 51         | 2            | 21        | 17        | 53          | 53     |
| COMMD10   | 19  | 25   | 25  | 19     | 25  | 14         | 29           | 25        | 26        | 32          | 27     |
| CFL2      | 9   | 3    | 3   | 8      | 45  | 18         | 48           | 42        | 56        | 16          | 19     |
| FBXO32    | 19  | 25   | 25  | 19     | 29  | 29         | 13           | 19        | 17        | 33          | 43     |
| TSC22D3   | 34  | 3    | 3   | 34     | 12  | 51         | 2            | 15        | 9         | 55          | 55     |
| ADORA1    | 19  | 25   | 25  | 19     | 20  | 40         | 13           | 22        | 19        | 42          | 40     |
| PTPRR     | 19  | 25   | 25  | 19     | 30  | 29         | 13           | 28        | 31        | 33          | 34     |

|         |    |    |    |    |    |    |    |    |    |    |    |
|---------|----|----|----|----|----|----|----|----|----|----|----|
| BTBD9   | 19 | 25 | 25 | 19 | 23 | 40 | 13 | 27 | 30 | 43 | 38 |
| ERBB2IP | 34 | 25 | 25 | 34 | 43 | 10 | 29 | 46 | 40 | 11 | 13 |
| BHLHE40 | 19 | 3  | 3  | 19 | 26 | 40 | 48 | 37 | 44 | 44 | 44 |
| PPP2R1B | 34 | 3  | 3  | 34 | 24 | 51 | 13 | 33 | 28 | 55 | 55 |
| USP6NL  | 19 | 25 | 25 | 19 | 40 | 29 | 29 | 38 | 41 | 33 | 35 |
| HTR1B   | 34 | 25 | 25 | 34 | 32 | 40 | 13 | 26 | 21 | 44 | 51 |
| IRF2    | 34 | 3  | 3  | 34 | 27 | 51 | 29 | 30 | 29 | 55 | 55 |
| ADSS    | 9  | 3  | 3  | 8  | 58 | 29 | 62 | 57 | 67 | 37 | 36 |
| TAF12   | 34 | 25 | 25 | 34 | 48 | 25 | 48 | 41 | 44 | 24 | 32 |
| BRCA2   | 19 | 25 | 25 | 19 | 51 | 29 | 48 | 39 | 48 | 33 | 45 |
| MOG     | 34 | 25 | 25 | 34 | 39 | 40 | 29 | 34 | 32 | 44 | 48 |
| PRSS23  | 34 | 25 | 25 | 34 | 46 | 23 | 62 | 49 | 57 | 21 | 11 |
| SNTB2   | 34 | 25 | 25 | 34 | 63 | 14 | 48 | 62 | 59 | 13 | 15 |
| PGM1    | 19 | 3  | 3  | 19 | 56 | 29 | 62 | 61 | 67 | 37 | 36 |
| CIRBP   | 61 | 25 | 25 | 61 | 33 | 51 | 2  | 31 | 24 | 55 | 55 |
| RRAGC   | 61 | 25 | 25 | 61 | 35 | 51 | 2  | 31 | 24 | 55 | 55 |
| ING2    | 19 | 25 | 25 | 19 | 65 | 27 | 62 | 56 | 63 | 27 | 39 |
| COTL1   | 34 | 3  | 3  | 34 | 49 | 51 | 48 | 53 | 58 | 55 | 55 |
| FEM1C   | 34 | 25 | 25 | 34 | 31 | 51 | 48 | 40 | 47 | 54 | 54 |
| CNTN1   | 34 | 25 | 25 | 34 | 71 | 17 | 62 | 70 | 70 | 15 | 21 |
| HEXIM1  | 61 | 25 | 25 | 61 | 34 | 51 | 13 | 35 | 32 | 55 | 55 |
| PTPN1   | 61 | 25 | 25 | 61 | 37 | 51 | 13 | 35 | 32 | 55 | 55 |
| HTRA1   | 34 | 25 | 25 | 34 | 68 | 25 | 71 | 64 | 67 | 24 | 16 |
| SCRN1   | 34 | 25 | 25 | 34 | 53 | 40 | 48 | 55 | 60 | 44 | 46 |
| HS3ST1  | 34 | 25 | 25 | 34 | 77 | 18 | 71 | 73 | 74 | 16 | 22 |
| HS2ST1  | 19 | 25 | 25 | 19 | 76 | 23 | 78 | 79 | 80 | 20 | 26 |
| PTCHD2  | 61 | 25 | 25 | 61 | 38 | 51 | 29 | 44 | 38 | 55 | 55 |
| ZHX2    | 61 | 25 | 25 | 61 | 41 | 51 | 29 | 43 | 37 | 55 | 55 |
| DHX16   | 61 | 25 | 25 | 61 | 42 | 51 | 29 | 44 | 38 | 55 | 55 |
| PARL    | 34 | 25 | 25 | 34 | 75 | 27 | 78 | 72 | 75 | 28 | 23 |
| METTL3  | 61 | 25 | 25 | 61 | 54 | 51 | 29 | 50 | 42 | 55 | 55 |
| P2RY12  | 61 | 25 | 25 | 61 | 50 | 51 | 29 | 52 | 46 | 55 | 55 |
| FBXL4   | 61 | 25 | 25 | 61 | 59 | 51 | 29 | 50 | 42 | 55 | 55 |
| EGR3    | 61 | 25 | 25 | 61 | 44 | 51 | 48 | 47 | 50 | 55 | 55 |

|            |    |    |    |    |    |    |    |    |    |    |    |
|------------|----|----|----|----|----|----|----|----|----|----|----|
| CRH        | 61 | 25 | 25 | 61 | 57 | 51 | 29 | 54 | 49 | 55 | 55 |
| SDK2       | 61 | 25 | 25 | 61 | 52 | 51 | 29 | 58 | 52 | 55 | 55 |
| ASPA       | 34 | 3  | 3  | 34 | 66 | 51 | 71 | 76 | 77 | 55 | 55 |
| MAFG       | 61 | 25 | 25 | 61 | 47 | 51 | 48 | 47 | 50 | 55 | 55 |
| ASRGL1     | 34 | 3  | 3  | 34 | 69 | 51 | 71 | 76 | 77 | 55 | 55 |
| DUSP4      | 61 | 25 | 25 | 61 | 60 | 51 | 29 | 59 | 53 | 55 | 55 |
| NUAK1      | 61 | 25 | 25 | 61 | 61 | 51 | 29 | 59 | 53 | 55 | 55 |
| STOM       | 34 | 25 | 25 | 34 | 80 | 29 | 82 | 80 | 81 | 37 | 30 |
| ENPP3      | 34 | 25 | 25 | 34 | 72 | 40 | 71 | 75 | 76 | 44 | 46 |
| NFYB       | 34 | 25 | 25 | 34 | 78 | 40 | 71 | 71 | 72 | 44 | 52 |
| CSGALNACT1 | 34 | 25 | 25 | 34 | 79 | 29 | 82 | 82 | 83 | 37 | 41 |
| OMG        | 61 | 25 | 25 | 61 | 62 | 51 | 48 | 63 | 55 | 55 | 55 |
| RIN1       | 61 | 25 | 25 | 61 | 64 | 51 | 48 | 66 | 61 | 55 | 55 |
| RIN2       | 61 | 25 | 25 | 61 | 67 | 51 | 48 | 66 | 61 | 55 | 55 |
| KLF10      | 61 | 25 | 25 | 61 | 55 | 51 | 62 | 65 | 64 | 55 | 55 |
| HS3ST2     | 34 | 25 | 25 | 34 | 82 | 40 | 82 | 83 | 84 | 44 | 48 |
| ERLIN2     | 34 | 25 | 25 | 34 | 83 | 40 | 85 | 85 | 85 | 44 | 42 |
| CSPG5      | 34 | 25 | 25 | 34 | 84 | 40 | 85 | 86 | 86 | 44 | 48 |
| FAM175A    | 61 | 25 | 25 | 61 | 70 | 51 | 62 | 68 | 65 | 55 | 55 |
| MCM8       | 61 | 25 | 25 | 61 | 73 | 51 | 62 | 68 | 65 | 55 | 55 |
| ARHGAP25   | 61 | 25 | 25 | 61 | 74 | 51 | 62 | 74 | 71 | 55 | 55 |
| SAP30      | 61 | 25 | 25 | 61 | 81 | 51 | 71 | 78 | 73 | 55 | 55 |
| RBMS1      | 61 | 25 | 25 | 61 | 86 | 51 | 78 | 81 | 79 | 55 | 55 |
| PDE2A      | 61 | 25 | 25 | 61 | 85 | 51 | 78 | 84 | 82 | 55 | 55 |
| RCCD1      | 61 | 25 | 25 | 61 | 87 | 51 | 85 | 87 | 87 | 55 | 55 |
| RAB40B     | 61 | 25 | 25 | 61 | 88 | 51 | 88 | 88 | 88 | 55 | 55 |
| NEFM       | 61 | 25 | 25 | 61 | 89 | 51 | 88 | 89 | 89 | 55 | 55 |

**Table S4.** Highest-interacting genes in the protein-protein interaction network of differentially expressed genes of the cerebral cortex between mice that were sleep deprived for 6 hours and circadian-matched controls that were left undisturbed.

| Interactome rank | Gene name | Gene edges | Interacting genes                                                    |
|------------------|-----------|------------|----------------------------------------------------------------------|
| 1                | NFKBIA    | 8          | ASB11   BCL6   FBXO32   IRF3   MAP2K3   PPP3CA   SERPINB1A   TSC22D3 |
| 2                | EZR       | 6          | ADORA1   EDN1   HTR1B   MAP2K5   NFKBIA   SERPINB1A                  |
| 3                | SGK1      | 7          | CIRBP   NFKBIA   PPP2R2D   RND3   RRAGC   SLC9A3R2   TSC22D3         |

**Table S5.** Characteristics of highest-interacting genes in the protein-protein interaction network of differentially expressed genes of the cerebral cortex between mice that were sleep deprived for 6 hours and circadian-matched controls that were left undisturbed.

| <b>Gene ID</b> | <b><i>P</i>-value</b> | <b><i>Z</i>-score</b> | <b>Gene name</b>                        |
|----------------|-----------------------|-----------------------|-----------------------------------------|
| NFKBIA         | 7.72E-03              | 4.10                  | NFKB inhibitor alpha                    |
| EZR            | 6.34E-04              | 4.87                  | ezrin                                   |
| SGK1           | 1.82E-02              | 3.80                  | serum/glucocorticoid regulated kinase 1 |
